# Supplementary material for: Characteristics of the urinary microbiome in kidney stone patients with hypertension
Source: PubMed Central journal article supplement (PMC7079538; doi:10.1186/s12967-020-02282-3), 2020-03-17

### Acidobacteria

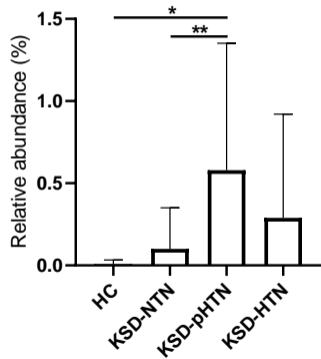

### Bacteroidetes

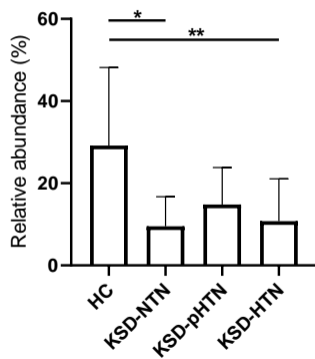

### Deinococcus-thermus

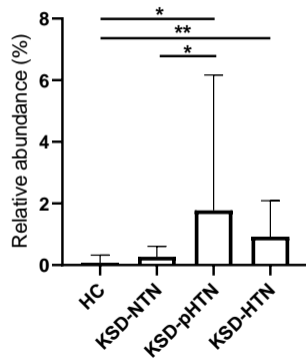

### Fusobacteria

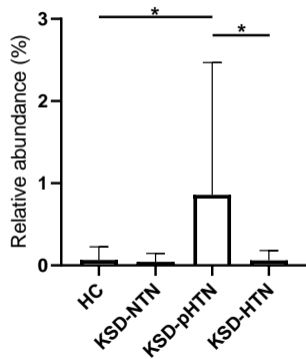

Supplement: 12967_2020_2282_MOESM1_ESM.pdf [file 12967_2020_2282_MOESM1_ESM.pdf]
